# Supplementary material
Source: PubMed Central journal article supplement (PMC2668010)
Supplement: mmc1.pdf [file mmc1.pdf]

Supplemental Data

**Mutations in *SPATA7* Cause Leber Congenital Amaurosis**

**and Juvenile Retinitis Pigmentosa**

Hui Wang,<sup>1,7</sup> Anneke I. den Hollander,<sup>10,11</sup> Yalda Moayed, <sup>3</sup> Abuduaini Abulimiti,<sup>1,7</sup> Yumei Li,<sup>1,7</sup> Rob W.J. Collin,<sup>10</sup> Carel B. Hoyng,<sup>11</sup> Irma Lopez,<sup>12</sup> Molly Bray,<sup>8</sup> Richard Alan Lewis,<sup>1,2,9</sup> James R. Lupski,<sup>1,5,9</sup> Graeme Mardon,<sup>1,2,3,4,6</sup> Robert K. Koenekoop,<sup>12</sup> and Rui Chen<sup>1,6,7,\*</sup>

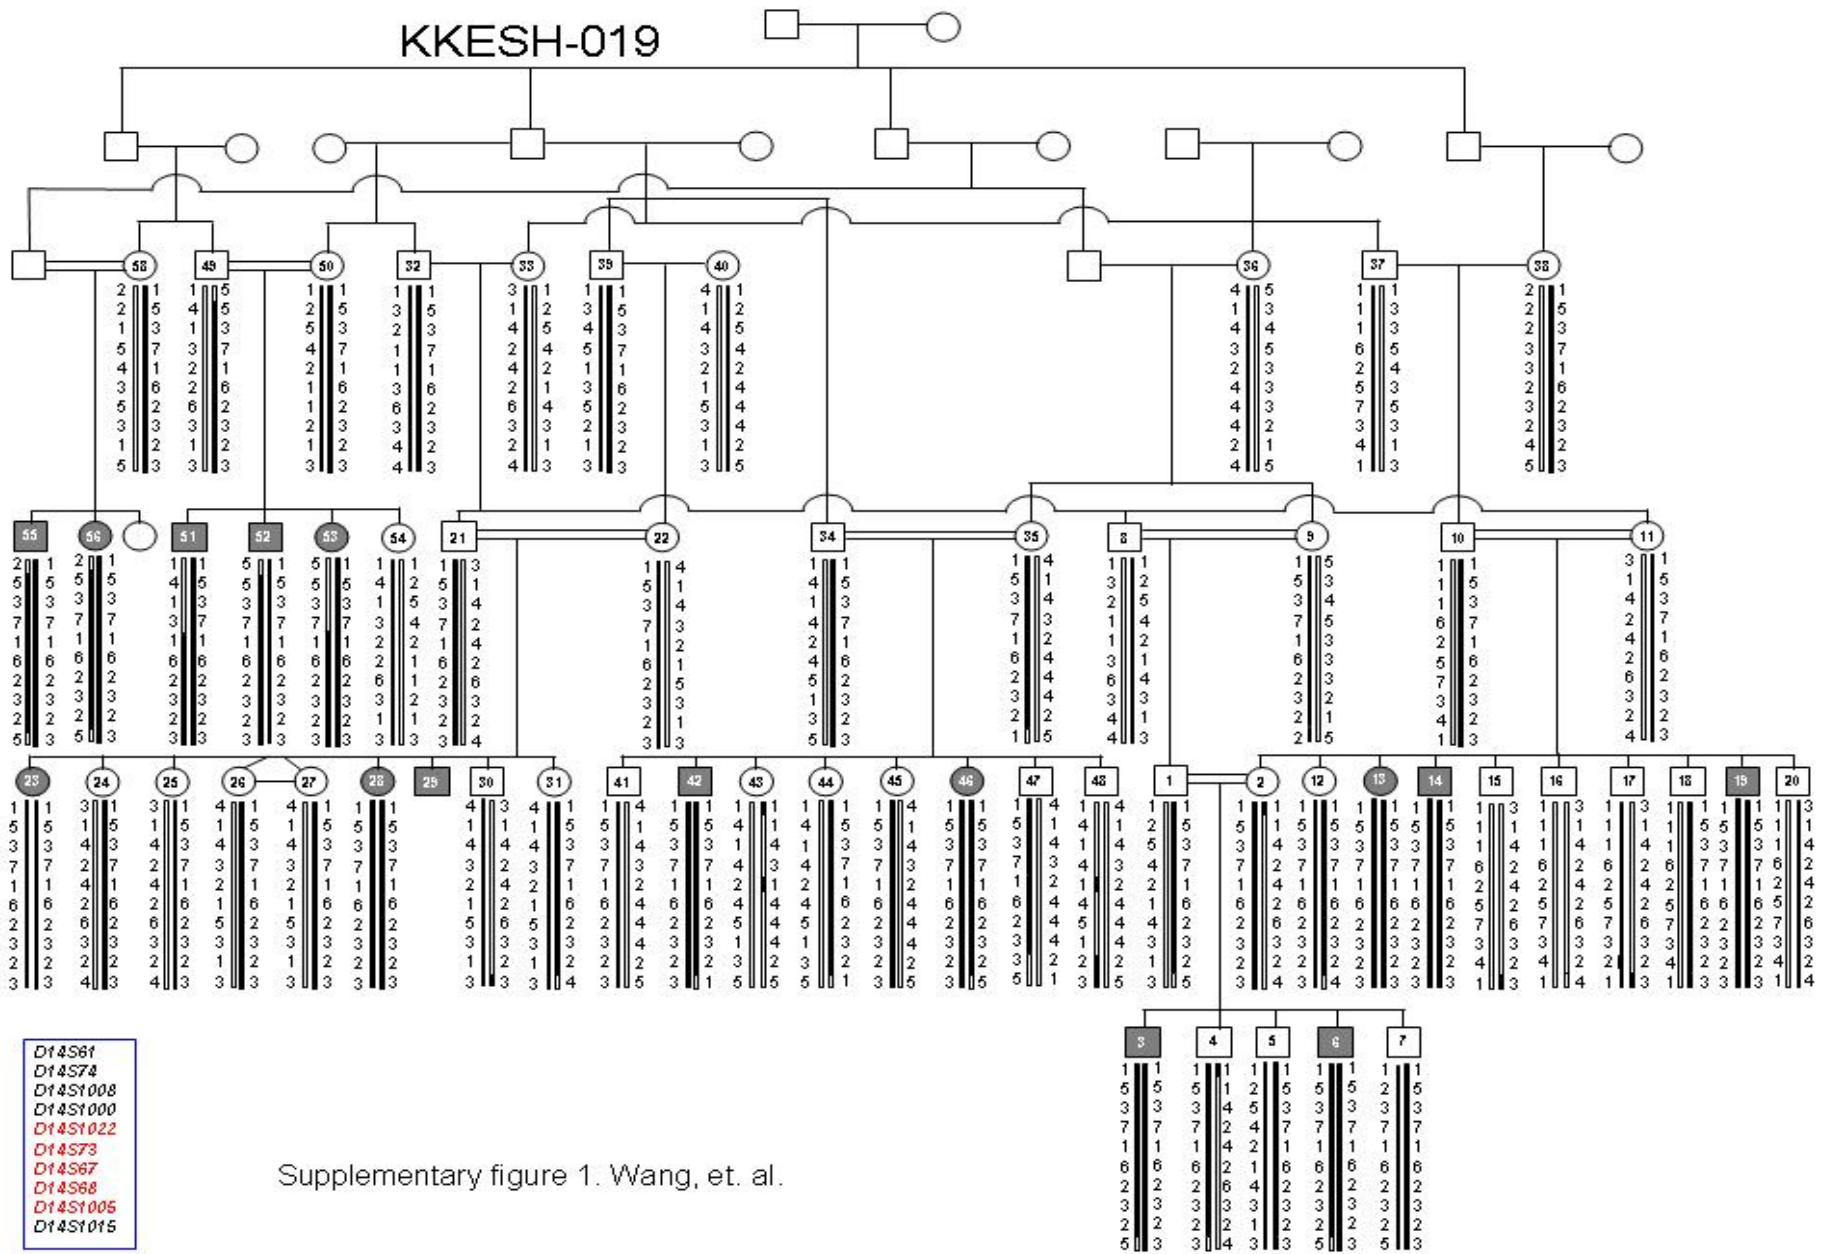

**Figure S1. Pedigree and Haplotypes of KKESH-019**

Genotyped markers between *D14S61* and *D14S1015* are shown in the blue box, and each individual's allele numbers are listed. The disease allele is indicated in black. The markers that show homozygous in all affected members are in red.

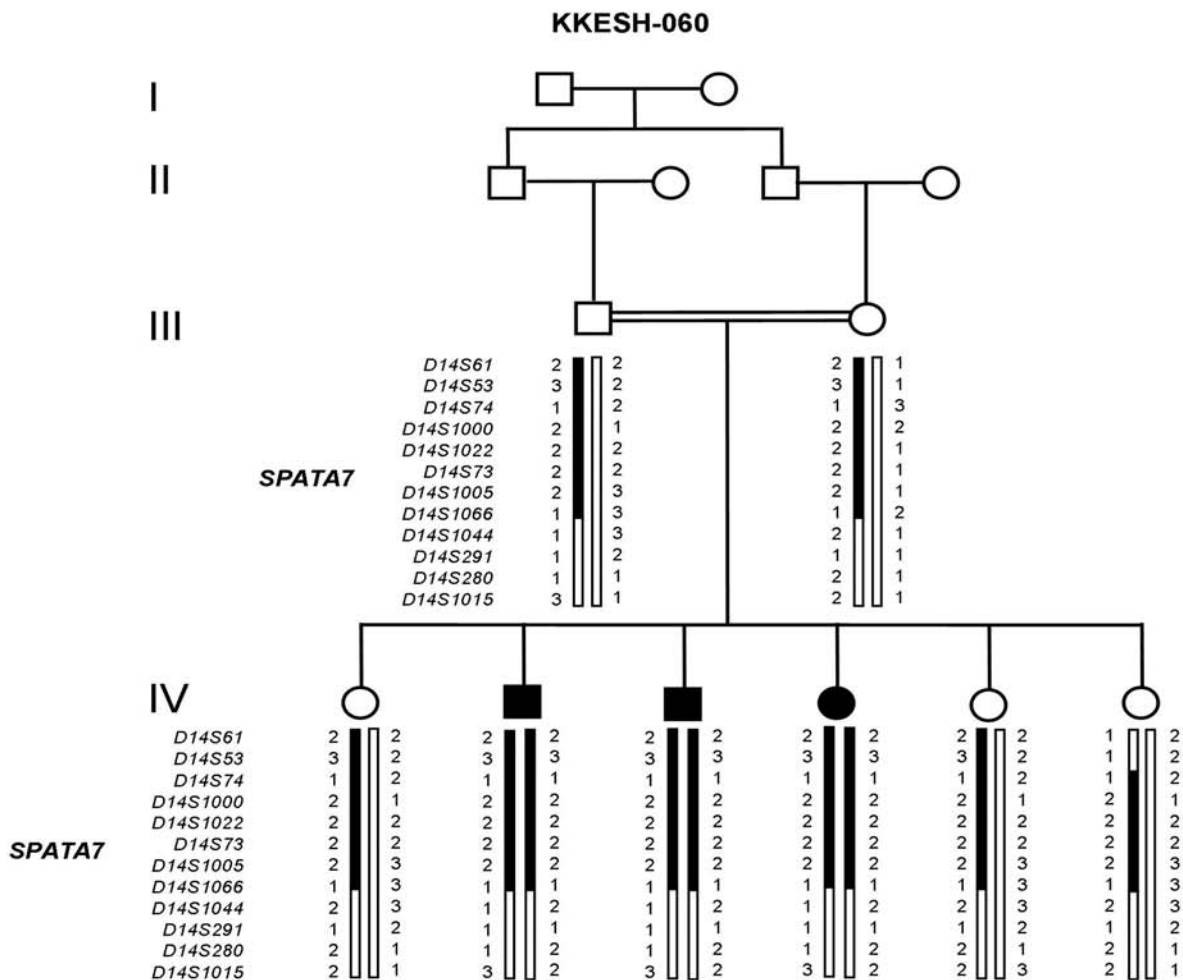

Supplementary Figure 2. Wang, et. al.

**Figure S2. Homozygosity Mapping of KKESH-060**

Genotyped markers between *D14S61* and *D14S1015* are shown, and each individual's allele numbers are listed. The homozygous region shared by three affected members is indicated in black. The *SPATA7* gene is located between markers *D14S73* and *D14S1005*.

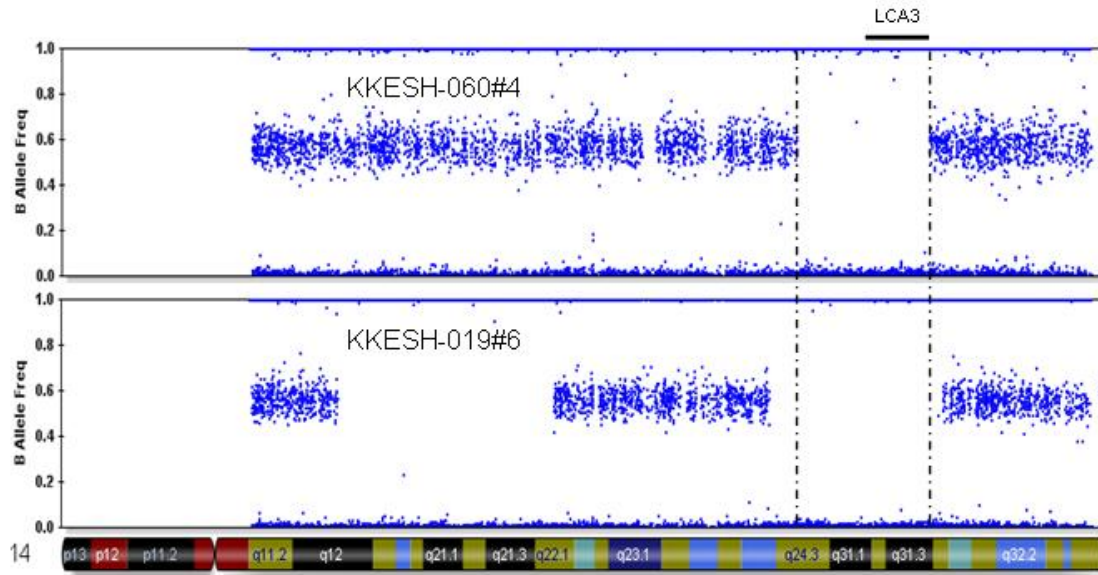

Supplementary Figure 3. Wang, et. al.

**Figure S3. SNP Mapping Is Consistent with STR Results**

One patient from each LCA3 family (KKESH-060#4 and KKESH-019#6) was chosen to do the SNP genotyping. The homozygous block of both KKESH-019#6 and KKESH-060#4 on chromosome 14 are generated by Illumina Beadsstudio software. The shared the region, which is from 14q24.3 to 14q31.3, is indicated by a black dash. The bar indicates the homozygous region generated by the STR genotyping based on all the members from KKESH-060 and KKESH-019.

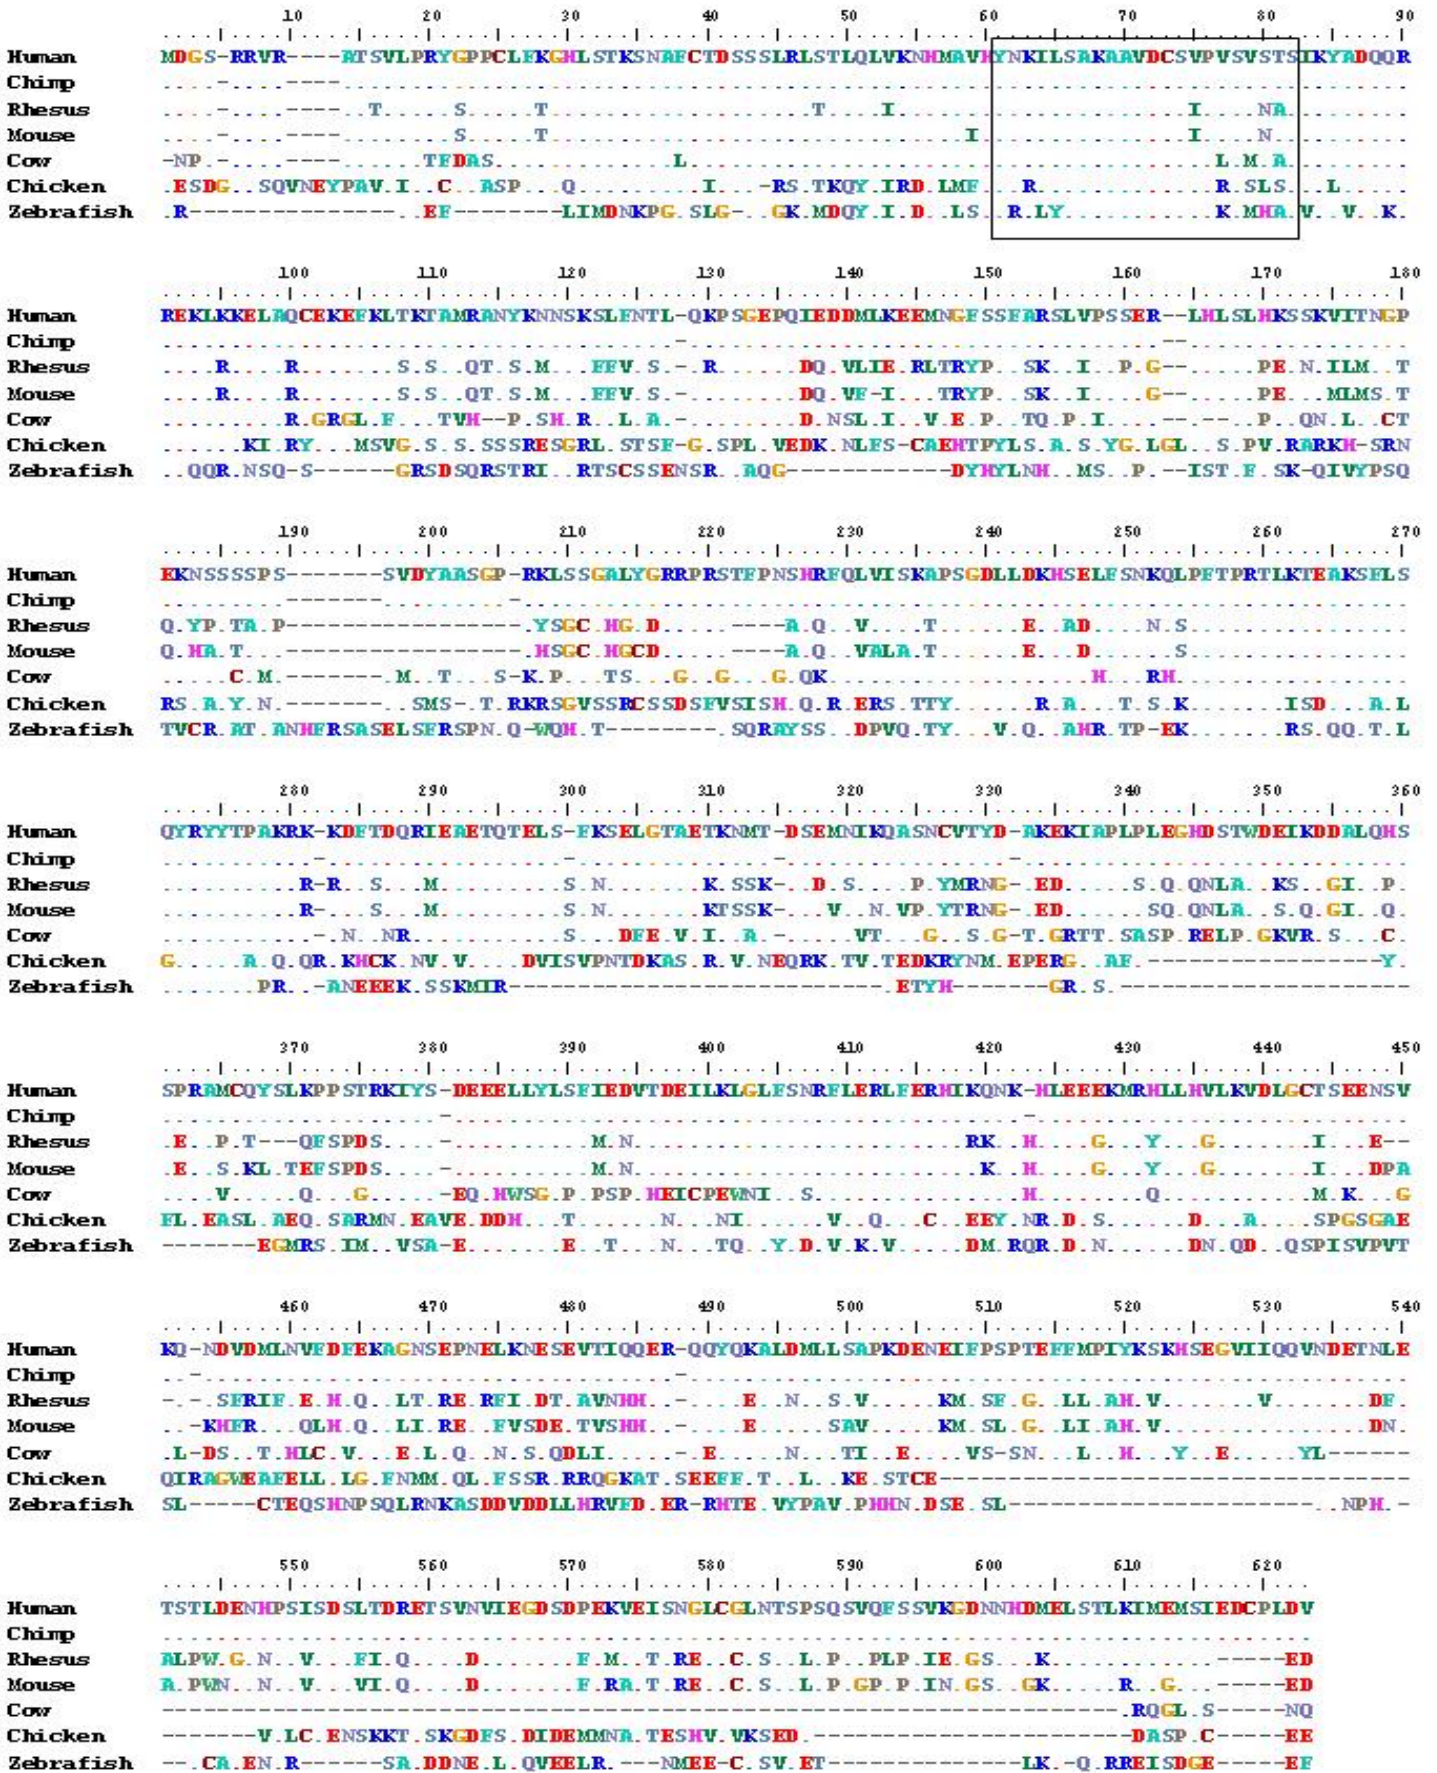

Supplementary Figure 4. Wang, et. al.



**Figure S4. Amino Acid Alignments of SPATA7 Proteins from Different Species Reveal a Highly Conserved Protein**

Amino acid sequences were aligned using Tcoffee

([http://www.tcoffee.org/Projects\\_home\\_page/t\\_coffee\\_home\\_page.html](http://www.tcoffee.org/Projects_home_page/t_coffee_home_page.html)). The dots below each line represent the same amino acid as in the human sequence. A predicted transmembrane domain is highlighted.

**Table S1. List of Microsatellite Markers**

| <b>Marker</b>   | <b>Size</b> | <b>Location</b> | <b>Max Heterozygosity</b> |
|-----------------|-------------|-----------------|---------------------------|
| <i>D14S61</i>   | 197-227     | chr14:75404993  | 0.81                      |
| <i>D14S53</i>   | 135-155     | chr14:75992089  | NA                        |
| <i>D14S42</i>   | 115-133     | chr14:76200151  | 0.68                      |
| <i>D14S59</i>   | 99-109      | chr14:77142282  | 0.88                      |
| <i>D14S74</i>   | 281-313     | chr14:77728132  | 0.8                       |
| <i>D14S1008</i> | 112-126     | chr14:78971571  | 0.66                      |
| <i>D14S1000</i> | 107-133     | chr14:81175672  | 0.7                       |
| <i>D14S1022</i> | 236-246     | chr14:84845288  | 0.73                      |
| <i>D14S73</i>   | 99-119      | chr14:86152265  | 0.67                      |
| <i>D14S67</i>   | 133-167     | chr14:87457553  | 0.88                      |
| <i>D14S68</i>   | 148-172     | chr14:87697387  | 0.89                      |
| <i>D14S1005</i> | 204-230     | chr14:88447727  | 0.72                      |
| <i>D14S1066</i> | 288-298     | chr14:88872000  | 0.66                      |
| <i>D14s1044</i> | 219-261     | chr14:89140146  | 0.65                      |
| <i>D14S291</i>  | 210-216     | chr14:90339518  | 0.46                      |
| <i>D14S280</i>  | 229-241     | chr14:91252620  | 0.69                      |
| <i>D14S1015</i> | 252-264     | chr14:91806196  | 0.76                      |

A total of 17 STR markers that span the *LCA3* locus are used to genotype all members of the potential patient families. The identification and chromosomal locations of these markers are listed.

**Table S2. Primers of SPATA7 Exons**

| Primer name   | Primer sequence(5'-3')                           | size | temp |
|---------------|--------------------------------------------------|------|------|
| SPATA7-1-F    | CTCGTGAAAACGACGGCCAGTCGCAACTGTCCTCCTAGTACC       | 486  | 55   |
| SPATA7-1-R    | CTGCTCAGGAAACAGCTATGACACAAATTCAGGGCAAAGAAGC      |      |      |
| SPATA7-2-F    | CTCGTGAAAACGACGGCCAGTTTTAATGCTGTAACCTCAGACTTCCT  | 369  | 55   |
| SPATA7-2-R    | CTGCTCAGGAAACAGCTATGACTGAAGTTCAAATATTCGTCAAATG   |      |      |
| SPATA7-3-F    | CTCGTGAAAACGACGGCCAGTAAGTTTTGAACCCAAATGGTC       | 475  | 55   |
| SPATA7-3-R    | CTGCTCAGGAAACAGCTATGACCAAAAATGGGTATGAATTTGCT     |      |      |
| SPATA7-4-F    | CTCGTGAAAACGACGGCCAGTCAAGGTCTGGAACATTTTGTGA      | 334  | 55   |
| SPATA7-4-R    | CTGCTCAGGAAACAGCTATGACTGTTTATGTGGCACAGGAATTT     |      |      |
| SPATA7-5-F    | CTCGTGAAAACGACGGCCAGTATCTAGAGGCACATGTGAAATAAA    | 398  | 55   |
| SPATA7-5-R    | CTGCTCAGGAAACAGCTATGACCAAAGTCAGATTGTACCACTAAAGAA |      |      |
| SPATA7-6.1-F  | CTCGTGAAAACGACGGCCAGTTTTTGTAAACCCTTGAGGCTATC     | 458  | 55   |
| SPATA7-6.1-R  | CTGCTCAGGAAACAGCTATGACGGAGTGAATGGCAATTGTTTGT     |      |      |
| SPATA7-6.2-F  | CTCGTGAAAACGACGGCCAGTAGTCATCACAATGGTCCTGAG       | 467  | 55   |
| SPATA7-6.2-R  | CTGCTCAGGAAACAGCTATGACTTCCAATCAAAGGGCACTATC      |      |      |
| SPATA7-7-F    | CTCGTGAAAACGACGGCCAGTCTGGCAGTAGGTTTTAGTTGTTTT    | 449  | 55   |
| SPATA7-7-R    | CTGCTCAGGAAACAGCTATGACTGTATGATAAGTGCCACCAACAG    |      |      |
| SPATA7-8-F    | CTCGTGAAAACGACGGCCAGTTGCTGTGTTATATTCTGCTTTCG     | 296  | 55   |
| SPATA7-8-R    | CTGCTCAGGAAACAGCTATGACTAGATTGGAGCATGCAATTA       |      |      |
| SPATA7-9-F    | CTCGTGAAAACGACGGCCAGTCATTAACCTTAGTCAAATTGTCATTG  | 688  | 55   |
| SPATA7-9-R    | CTGCTCAGGAAACAGCTATGACTGGTTTCTTTGATTCTTAATCCTTG  |      |      |
| SPATA7-10-F   | CTCGTGAAAACGACGGCCAGTCCAGTGGATTGCATTTGA          | 600  | 55   |
| SPATA7-10-R   | CTGCTCAGGAAACAGCTATGACGGTGAACCTCCCTAGAGTATGA     |      |      |
| SPATA7-11-F   | CTCGTGAAAACGACGGCCAGTTTTTCAACCTTTGTAGTTTCAGTG    | 300  | 55   |
| SPATA7-11-R   | CTGCTCAGGAAACAGCTATGACTTCCTTTCACTTCTCCACCAC      |      |      |
| SPATA7-12.1-F | CTCGTGAAAACGACGGCCAGTAATCCTGTGAGATTTTCAGCAC      | 483  | 55   |
| SPATA7-12.1-R | CTGCTCAGGAAACAGCTATGACTCACAGAAGTTTCCCGATCTGT     |      |      |
| SPATA7-12.2-F | CTCGTGAAAACGACGGCCAGTGAAGTAACAATTCAGCAGGAACG     | 469  | 55   |
| SPATA7-12.2-R | CTGCTCAGGAAACAGCTATGACTGAGTTACTGGCCATTTGAGGT     |      |      |
